# Supplementary material for: Multiethnic Genetic Association Studies Improve Power for Locus Discovery
Source: PLoS One. 2010 Sep 8;5(9):e12600. doi: 10.1371/journal.pone.0012600 (PMC2935880; doi:10.1371/journal.pone.0012600)
Supplement: Table S6 — Power to detect an association for a sample size of 80,000 using 1000 Genomes data. Power for individual population panels as well as multiethnic GWAS is calculated for this sample size, as in the HapMap 3 analysis. Data points referred to in the paper and in figures appear in bold. (0.03 MB XLS) [file pone.0012600.s009.xls]

## Sheet: 80K
N = 80000
	stage 1:	stage 2:
	10000 cases	30000 cases
	10000 controls	30000 controls
RR = 1.1		Minor Allele Frequency in CEU	SNP Count	CEU	CHB+JPT	YRI	MAJOR CONTINENTAL (CEU + CHB+JPT + YRI)
		0	68267	0	0.0344478	0.306398	0.0481523
		0.01	58313	0.000107319	0.209555	0.386376	0.147823
		0.02	57309	0.00144646	0.321674	0.442164	0.234424
		0.03	54139	0.00735753	0.416665	0.495547	0.322946
		0.04	52571	0.023262	0.488608	0.529244	0.397229
		0.05	101040	0.080389	0.560665	0.564005	0.486983
		0.1	322056	0.404027	0.679351	0.648432	0.676935
		0.25	1004248	0.930244	0.846037	0.804263	0.921629
		0.5	1609814	0.999767	0.960602	0.925774	0.99578
		Aggregate: 1-5%	323372	0.0304074	0.419172	0.493268	0.339009
		Aggregate: all SNPs	3327757	0.806425	0.827197	0.807529	0.859284
RR = 1.2		Minor Allele Frequency in CEU	SNP Count	CEU	CHB+JPT	YRI	MAJOR CONTINENTAL (CEU + CHB+JPT + YRI)
		0	68267	0	0.08637	0.611988	0.390528
		0.01	58313	0.0185318	0.388353	0.70838	0.62912
		0.02	57309	0.237474	0.570935	0.769457	0.770307
		0.03	54139	0.614395	0.703103	0.824391	0.868021
		0.04	52571	0.867114	0.791075	0.858828	0.924886
		0.05	101040	0.979465	0.865871	0.897144	0.969674
		0.1	322056	0.999756	0.949422	0.957439	0.997019
		0.25	1004248	1	0.995562	0.996421	0.999992
		0.5	1609814	1	0.999991	0.999987	0.999998
		Aggregate: 1-5%	323372	0.595299	0.688081	0.822066	0.84863
		Aggregate	3327757	0.940135	0.944708	0.969544	0.972496
RR = 1.3		Minor Allele Frequency in CEU	SNP Count	CEU	CHB+JPT	YRI	MAJOR CONTINENTAL (CEU + CHB+JPT + YRI)
		0	68267	0	0.122412	0.710495	0.567749
		0.01	58313	0.271195	0.440828	0.80454	0.780548
		0.02	57309	0.890397	0.634675	0.860266	0.902698
		0.03	54139	0.994523	0.778467	0.908888	0.970282
		0.04	52571	0.99987	0.873116	0.942393	0.992726
		0.05	101040	0.999999	0.94696	0.973292	0.999198
		0.1	322056	1	0.994169	0.996777	0.999994
		0.25	1004248	1	0.999982	0.999988	1
		0.5	1609814	1	0.999998	1	1
		Aggregate: 1-5%	323372	0.848214	0.760132	0.907025	0.936774
		Aggregate	3327757	0.964736	0.958117	0.984711	0.984988
RR = 1.4		Minor Allele Frequency in CEU	SNP Count	CEU	CHB+JPT	YRI	MAJOR CONTINENTAL (CEU + CHB+JPT + YRI)
		0	68267	0	0.163098	0.755991	0.658261
		0.01	58313	0.737044	0.483503	0.844384	0.862856
		0.02	57309	0.997305	0.705282	0.901545	0.972456
		0.03	54139	0.999996	0.872443	0.952984	0.997307
		0.04	52571	1	0.95484	0.981285	0.999835
		0.05	101040	1	0.990934	0.995826	1
		0.1	322056	1	0.99977	0.999886	1
		0.25	1004248	1	1	1	1
		0.5	1609814	1	1	1	1
		Aggregate: 1-5%	323372	0.952103	0.8231	0.942271	0.96991
		Aggregate	3327757	0.974831	0.965619	0.989374	0.990065
RR = 1.5		Minor Allele Frequency in CEU	SNP Count	CEU	CHB+JPT	YRI	MAJOR CONTINENTAL (CEU + CHB+JPT + YRI)
		0	68267	0	0.19406	0.780611	0.710863
		0.01	58313	0.945154	0.51922	0.862441	0.923115
		0.02	57309	0.999986	0.805816	0.937025	0.994896
		0.03	54139	1	0.950871	0.982214	0.999895
		0.04	52571	1	0.990487	0.996105	1
		0.05	101040	1	0.999188	0.999633	1
		0.1	322056	1	0.999997	0.999998	1
		0.25	1004248	1	1	1	1
		0.5	1609814	1	1	1	1
		Aggregate: 1-5%	323372	0.990107	0.868863	0.960308	0.985213
		Aggregate	3327757	0.978524	0.970723	0.991642	0.992632
